# Supplementary material for: Platinum(ii) and palladium(ii) complexes derived from 1-ferrocenylmethyl-3,5-diphenylpyrazole. Coordination, cyclometallation or transannulation?
Source: Royal Society of Chemistry journal article supplement (doi:10.1039/c1ra01080h), 2012-01-01
Supplement: c1ra01080h.pdf [file c1ra01080h.pdf]

## **Platinum(II) and Palladium(II) Complexes derived from**

### **1-Ferrocenylmethyl-3,5-diphenylpyrazole.**

#### **Coordination, Cyclometallation or Transannulation?**

Concepción López,<sup>a,\*</sup> Asensio González,<sup>b</sup> Ramon Bosque,<sup>a</sup> Pradipta K. Basu,<sup>a,b</sup> Mercè Font-Bardía<sup>c</sup> and Teresa Calvet<sup>d</sup>

<sup>a</sup>*Departament de Química Inorgànica, Facultat de Química, Universitat de Barcelona, Martí i Franquès 1-11. E-08028-Barcelona (SPAIN).*

<sup>b</sup>*Laboratori de Química Orgànica, Facultat de Farmàcia, Universitat de Barcelona, Pl. Pius XII s/n. E-08028-Barcelona (SPAIN).*

<sup>c</sup>*Unitat de Difracció de Raigs-X. Centre Científic i Tecnològic de la Universitat de Barcelona. Universitat de Barcelona. Solé i Sabaris 1-3, 08028-Barcelona, (SPAIN).*

<sup>d</sup>*Departament de Cristal·lografia Mineralogia i Dipòsits Minerals. Facultat de Geologia. Universitat de Barcelona, Martí i Franquès s/n. E-08028-Barcelona (SPAIN).*

## **SUPPORTING INFORMATION**

**(25 pages)**

## Contents:

**Figure S1.** Conformational map showing the variation of the total energy of the ligand as a function of the torsion angles  $\Phi(1)$  and  $\Phi(2)$ .

### Supplementary Tables:<sup>‡</sup>

**Table S1. a)** Final atomic coordinates for the optimized geometry of

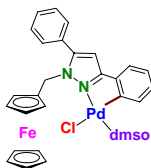

(A-type model complex with L = dmsO)

**b)** its calculated total energy in vacuum, toluene and methanol.

**Table S2. a)** Final atomic coordinates for the optimized geometry of

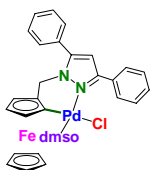

(B-type model complex with L = dmsO)

**b)** its calculated total energy in vacuum, toluene and methanol.

**Table S3. a)** Final atomic coordinates for the optimized geometry of

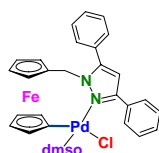

(C-type model complex with L = dmsO)

**b)** its calculated total energy (in vacuum, toluene and methanol).

**Table S4. a)** Final atomic coordinates for the optimized geometry of

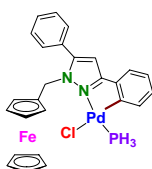

(A-type model complex with L = PH<sub>3</sub>)

**b)** its calculated total energy (in vacuum, toluene and methanol).

<sup>‡</sup> Letters **A**, **B** and **C** refer to the model complexes shown in the lower part of Table 5.

**Table S5. a)** Final atomic coordinates for the optimized geometry of

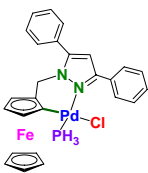

(B-type model complex with L = PH<sub>3</sub>)

**b)** its calculated total energy (in vacuum, toluene and methanol).

**Table S6. a)** Final atomic coordinates for the optimized geometry of

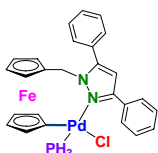

(C-type model complex with L = PH<sub>3</sub>)

**b)** its calculated total energy (in vacuum, toluene and methanol).

**Table S7. a)** Final atomic coordinates for the optimized geometry of

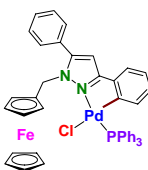

(A-type model complex with L = PPh<sub>3</sub>)

**b)** its calculated total energy in vacuum, toluene and methanol.

**Table S8. a)** Final atomic coordinates for the optimized geometry of

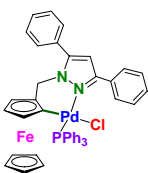

(B-type model complex with L = PPh<sub>3</sub>)

**b)** its calculated total energy in vacuum, toluene and methanol.

**Table S9. a)** Final atomic coordinates for the optimized geometry of

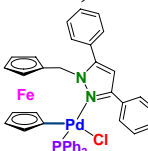

(C-type model complex with L = PPh<sub>3</sub>)

**b)** its calculated total energy in vacuum, toluene and methanol.

**Figure S1.** Conformational map showing the variation of the total energy of the ligand as a function of the torsion angles  $\Phi(1)$  and  $\Phi(2)$ .<sup>§</sup>

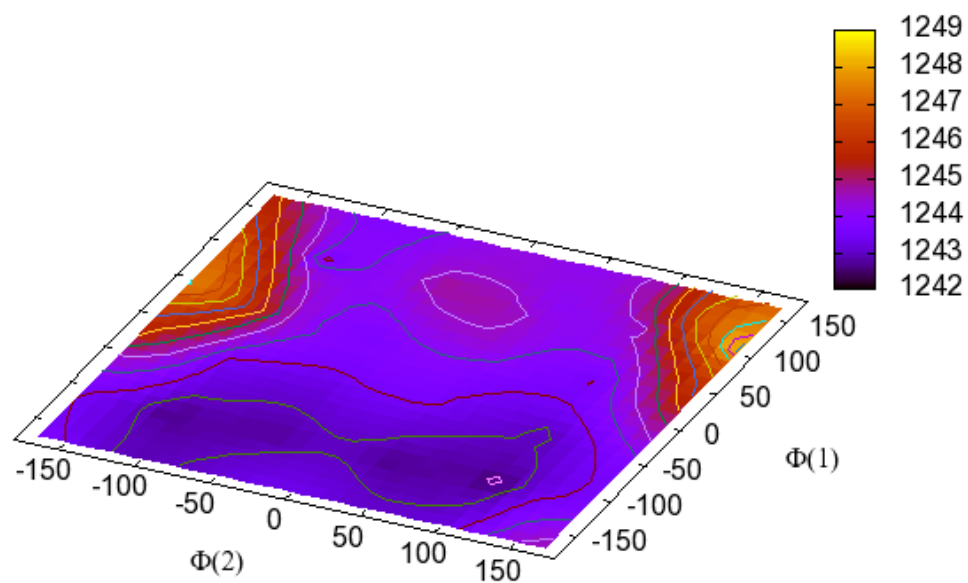

<sup>§</sup> Total energy in Kcal /mol and the torsión angles  $\Phi(1)$  and  $\Phi(2)$  in degrees.

**Supplementary Tables: \*\***

**Table S1. a)** Final atomic coordinates for the optimized geometry of

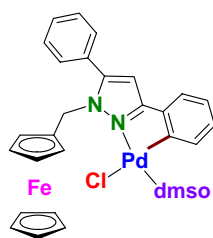

(A-type model complex with L = dmsoligand)

**b)** its calculated total energy in vacuum, toluene and methanol.

**a)**

| Atomic Number | Atomic Coordinates (Angstroms) |           |           |
|---------------|--------------------------------|-----------|-----------|
|               | X                              | Y         | Z         |
| 26            | -3.264670                      | -1.900021 | -0.709745 |
| 7             | -0.518360                      | 1.395871  | 0.532162  |
| 6             | -2.903530                      | -3.533507 | 0.520802  |
| 1             | -1.906503                      | -3.838705 | 0.809609  |
| 6             | -3.710698                      | -2.574241 | 1.204599  |
| 1             | -3.439315                      | -2.053225 | 2.113467  |
| 6             | -4.916064                      | -2.395088 | 0.459626  |
| 1             | -5.721232                      | -1.714605 | 0.704684  |
| 6             | -4.855080                      | -3.244592 | -0.686333 |
| 1             | -5.604915                      | -3.319260 | -1.463176 |
| 6             | -3.612367                      | -3.947827 | -0.647578 |
| 1             | -3.253646                      | -4.643391 | -1.395034 |
| 6             | -3.276306                      | 0.132178  | -1.133113 |
| 1             | -3.974907                      | 0.841814  | -0.709136 |
| 6             | -3.459645                      | -0.612546 | -2.335478 |
| 1             | -4.328113                      | -0.575175 | -2.980042 |
| 6             | -2.319376                      | -1.455210 | -2.510714 |
| 1             | -2.176242                      | -2.169192 | -3.311227 |
| 6             | -1.432214                      | -1.235736 | -1.417133 |
| 1             | -0.504484                      | -1.754744 | -1.219518 |
| 6             | -2.022633                      | -0.256865 | -0.553399 |
| 6             | -1.432660                      | 0.252409  | 0.732082  |
| 1             | -2.219544                      | 0.595894  | 1.404008  |
| 1             | -0.853591                      | -0.525251 | 1.230925  |
| 6             | -0.869980                      | 2.703189  | 0.336320  |
| 6             | 0.242187                       | 3.362370  | -0.170186 |
| 1             | 0.314885                       | 4.417635  | -0.386554 |
| 6             | 1.249673                       | 2.388780  | -0.262314 |

\*\* Letters **A**, **B** and **C** refer to the model complexes shown in the lower part of Table 5.

|    |           |           |           |
|----|-----------|-----------|-----------|
| 6  | 2.645036  | 2.414262  | -0.670735 |
| 6  | 3.261470  | 3.551856  | -1.205443 |
| 1  | 2.692565  | 4.471943  | -1.317348 |
| 6  | 4.599217  | 3.502962  | -1.594694 |
| 1  | 5.076954  | 4.385417  | -2.011577 |
| 6  | 5.314491  | 2.315749  | -1.444921 |
| 1  | 6.357594  | 2.267155  | -1.748365 |
| 6  | 4.705208  | 1.172965  | -0.904369 |
| 1  | 5.288784  | 0.264715  | -0.791933 |
| 6  | 3.369520  | 1.209645  | -0.515531 |
| 6  | -2.200768 | 3.258927  | 0.650435  |
| 6  | -2.894147 | 3.989648  | -0.327402 |
| 1  | -2.460639 | 4.095115  | -1.317604 |
| 6  | -4.134519 | 4.558716  | -0.038325 |
| 1  | -4.662178 | 5.117516  | -0.806309 |
| 6  | -4.698453 | 4.406013  | 1.230181  |
| 1  | -5.665394 | 4.847891  | 1.454217  |
| 6  | -4.011842 | 3.688263  | 2.212415  |
| 1  | -4.438128 | 3.577994  | 3.205695  |
| 6  | -2.769518 | 3.122087  | 1.927957  |
| 1  | -2.224779 | 2.592024  | 2.704383  |
| 7  | 0.773486  | 1.202203  | 0.153699  |
| 46 | 2.279169  | -0.300089 | 0.317921  |
| 17 | 0.923655  | -2.103113 | 1.419507  |
| 16 | 4.044489  | -1.879884 | 0.444639  |
| 6  | 4.186882  | -2.419110 | 2.184403  |
| 1  | 4.569228  | -1.558183 | 2.736814  |
| 1  | 4.910700  | -3.238120 | 2.209027  |
| 1  | 3.199335  | -2.708969 | 2.545589  |
| 6  | 3.465527  | -3.416005 | -0.358323 |
| 1  | 2.482684  | -3.673095 | 0.038826  |
| 1  | 4.219307  | -4.184428 | -0.166986 |
| 1  | 3.413844  | -3.194288 | -1.426462 |
| 8  | 5.453883  | -1.638878 | -0.052600 |

**b)**

**Calculated total energy (in Hartrees)**

| in vacuum      | in toluene     | in methanol    |
|----------------|----------------|----------------|
| -1543.22982335 | -1543.24340065 | -1543.25496056 |

**Table S2. a)** Final atomic coordinates for the optimized geometry of

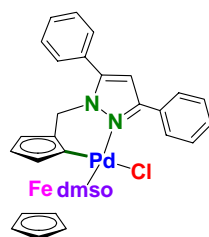

(B-type model complex with L = dmsol)

**b)** its calculated total energy in vacuum, toluene and methanol.

**a)**

| Atomic Number | Atomic Coordinates (Angstroms) |           |           |
|---------------|--------------------------------|-----------|-----------|
|               | X                              | Y         | Z         |
| 26            | -0.791271                      | -2.414980 | 1.015724  |
| 7             | -1.444896                      | 0.587259  | -0.819888 |
| 6             | -0.578821                      | -1.321511 | 2.785645  |
| 1             | 0.151484                       | -0.539751 | 2.943300  |
| 6             | -1.893711                      | -1.143922 | 2.261224  |
| 1             | -2.332662                      | -0.201333 | 1.963698  |
| 6             | -2.515557                      | -2.427808 | 2.185919  |
| 1             | -3.511499                      | -2.636488 | 1.816671  |
| 6             | -1.582775                      | -3.398046 | 2.663869  |
| 1             | -1.741275                      | -4.467904 | 2.701431  |
| 6             | -0.385670                      | -2.713693 | 3.033676  |
| 1             | 0.522314                       | -3.173906 | 3.400580  |
| 6             | -1.243460                      | -3.134995 | -0.874273 |
| 1             | -2.217921                      | -3.503861 | -1.171572 |
| 6             | -0.190193                      | -3.901284 | -0.291518 |
| 1             | -0.233715                      | -4.955431 | -0.047754 |
| 6             | 0.907986                       | -3.022491 | -0.027390 |
| 1             | 1.853045                       | -3.303002 | 0.413435  |
| 6             | 0.552656                       | -1.712080 | -0.467209 |
| 6             | -0.788182                      | -1.779472 | -0.967067 |
| 6             | -1.493549                      | -0.632974 | -1.630459 |
| 1             | -1.025937                      | -0.406263 | -2.598261 |
| 1             | -2.544491                      | -0.853837 | -1.813769 |
| 6             | -2.446863                      | 1.458743  | -0.511563 |
| 6             | -1.860081                      | 2.489480  | 0.210828  |
| 1             | -2.373267                      | 3.318515  | 0.674325  |
| 6             | -0.492606                      | 2.172585  | 0.321815  |
| 6             | 0.513890                       | 2.907632  | 1.105478  |
| 6             | 0.475567                       | 4.309603  | 1.138035  |
| 1             | -0.248420                      | 4.838713  | 0.524770  |
| 6             | 1.377818                       | 5.024856  | 1.923300  |
| 1             | 1.344372                       | 6.110909  | 1.927919  |

|    |           |           |           |
|----|-----------|-----------|-----------|
| 6  | 2.326186  | 4.349126  | 2.693978  |
| 1  | 3.028753  | 4.906749  | 3.307365  |
| 6  | 2.366671  | 2.953391  | 2.673303  |
| 1  | 3.096935  | 2.420670  | 3.276758  |
| 6  | 1.466749  | 2.236548  | 1.886896  |
| 1  | 1.494028  | 1.150960  | 1.877814  |
| 6  | -3.867377 | 1.278252  | -0.868487 |
| 6  | -4.558078 | 2.336425  | -1.480918 |
| 1  | -4.021572 | 3.248058  | -1.727592 |
| 6  | -5.914004 | 2.215788  | -1.783412 |
| 1  | -6.434029 | 3.041514  | -2.261066 |
| 6  | -6.598809 | 1.037251  | -1.479919 |
| 1  | -7.654777 | 0.943270  | -1.717424 |
| 6  | -5.922347 | -0.018345 | -0.864702 |
| 1  | -6.452631 | -0.932670 | -0.612907 |
| 6  | -4.567520 | 0.100301  | -0.555421 |
| 1  | -4.054089 | -0.711563 | -0.047715 |
| 46 | 1.563288  | 0.009978  | -0.725914 |
| 7  | -0.256636 | 1.019911  | -0.333800 |
| 17 | 2.671611  | 2.058700  | -1.546366 |
| 16 | 3.602337  | -1.098835 | -1.050538 |
| 6  | 4.900320  | -0.114546 | -0.222607 |
| 1  | 5.865568  | -0.543002 | -0.506109 |
| 1  | 4.733732  | -0.234532 | 0.849934  |
| 1  | 4.788027  | 0.929585  | -0.520836 |
| 6  | 4.073623  | -0.865643 | -2.799711 |
| 1  | 5.090819  | -1.246433 | -2.925841 |
| 1  | 3.984124  | 0.196737  | -3.036612 |
| 1  | 3.369713  | -1.458564 | -3.387586 |
| 8  | 3.833741  | -2.546551 | -0.687869 |

---

**b)**

**Calculated total energy (in Hartrees)**

| in vacuum      | in toluene     | in methanol    |
|----------------|----------------|----------------|
| -1543.21819539 | -1543.23391011 | -1543.24804485 |

---



**Table S3. a)** Final atomic coordinates for the optimized geometry of

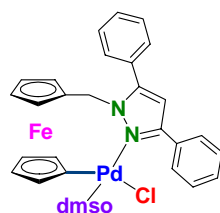

(C-type model complex with L = dmsol)

**b)** its calculated total energy (in vacuum, toluene and methanol).

**a)**

| Atomic Number | Atomic Coordinates (Angstroms) |           |           |
|---------------|--------------------------------|-----------|-----------|
|               | X                              | Y         | Z         |
| 26            | 0.248527                       | -2.408672 | 1.225600  |
| 7             | 1.589834                       | 0.445073  | -0.645775 |
| 6             | -0.621792                      | -0.799138 | 2.194853  |
| 1             | -0.106945                      | 0.122396  | 2.424380  |
| 6             | -1.341344                      | -1.086690 | 0.986453  |
| 6             | -1.823074                      | -2.432048 | 1.097211  |
| 1             | -2.406625                      | -2.960066 | 0.357977  |
| 6             | -1.408939                      | -2.962868 | 2.356166  |
| 1             | -1.596626                      | -3.967617 | 2.713598  |
| 6             | -0.667996                      | -1.952649 | 3.037438  |
| 1             | -0.194423                      | -2.052527 | 4.006211  |
| 6             | 1.014841                       | -3.299003 | -0.477641 |
| 1             | 0.416969                       | -3.578713 | -1.335784 |
| 6             | 1.293534                       | -4.119734 | 0.655866  |
| 1             | 0.936197                       | -5.129201 | 0.811105  |
| 6             | 2.074743                       | -3.353974 | 1.572180  |
| 1             | 2.415905                       | -3.680444 | 2.545880  |
| 6             | 2.286352                       | -2.062763 | 1.003926  |
| 1             | 2.819032                       | -1.244607 | 1.469583  |
| 6             | 1.622134                       | -2.018244 | -0.264437 |
| 6             | 1.625651                       | -0.887169 | -1.258958 |
| 1             | 2.532980                       | -0.917164 | -1.867681 |
| 1             | 0.769198                       | -0.953531 | -1.935147 |
| 6             | 2.646565                       | 1.228800  | -0.274199 |
| 6             | 2.124155                       | 2.261129  | 0.490112  |
| 1             | 2.668516                       | 3.103237  | 0.890524  |
| 6             | 0.730326                       | 2.058583  | 0.528963  |
| 6             | -0.272788                      | 2.916876  | 1.187810  |
| 6             | -0.022898                      | 3.385916  | 2.487907  |
| 1             | 0.886726                       | 3.083175  | 3.000116  |
| 6             | -0.940158                      | 4.217448  | 3.129159  |

|    |           |           |           |
|----|-----------|-----------|-----------|
| 1  | -0.738930 | 4.565154  | 4.138819  |
| 6  | -2.114824 | 4.597560  | 2.476211  |
| 1  | -2.829527 | 5.247062  | 2.974585  |
| 6  | -2.361966 | 4.147181  | 1.177684  |
| 1  | -3.263966 | 4.458020  | 0.656931  |
| 6  | -1.449134 | 3.312875  | 0.530785  |
| 1  | -1.624277 | 2.992462  | -0.492023 |
| 6  | 4.046128  | 0.997140  | -0.681807 |
| 6  | 5.054951  | 0.963339  | 0.293807  |
| 1  | 4.785455  | 1.064754  | 1.341363  |
| 6  | 6.389468  | 0.792279  | -0.073656 |
| 1  | 7.159134  | 0.763144  | 0.692617  |
| 6  | 6.734194  | 0.653502  | -1.419583 |
| 1  | 7.773612  | 0.517768  | -1.705040 |
| 6  | 5.738792  | 0.696884  | -2.398431 |
| 1  | 6.001883  | 0.605835  | -3.448581 |
| 6  | 4.404050  | 0.872961  | -2.034985 |
| 1  | 3.638210  | 0.944340  | -2.802436 |
| 7  | 0.427928  | 0.941463  | -0.152669 |
| 46 | -1.458034 | 0.098983  | -0.638743 |
| 16 | -3.587690 | -0.700114 | -1.228013 |
| 6  | -3.549413 | -1.205820 | -2.984504 |
| 1  | -2.971981 | -2.132281 | -3.019399 |
| 1  | -3.063698 | -0.420190 | -3.566082 |
| 1  | -4.581367 | -1.393477 | -3.293673 |
| 6  | -4.650112 | 0.782691  | -1.336820 |
| 1  | -4.758408 | 1.157581  | -0.316962 |
| 1  | -5.619416 | 0.468715  | -1.733636 |
| 1  | -4.149539 | 1.515913  | -1.972891 |
| 8  | -4.342376 | -1.766565 | -0.472147 |
| 17 | -1.508306 | 1.487692  | -2.706609 |

**b)**

**Calculated total energy (in Hartrees)**

| in vacuum        | in toluene     | in methanol    |
|------------------|----------------|----------------|
| -1543.22097937 H | -1386.43179221 | -1386.44390268 |

**Table S4. a)** Final atomic coordinates for the optimized geometry of

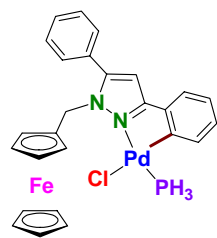

(A-type model complex with L = PH<sub>3</sub>)

**b)** its calculated total energy (in vacuum, toluene and methanol).

**a)**

| Atomic Number | Atomic Coordinates (Angstroms) |           |           |
|---------------|--------------------------------|-----------|-----------|
|               | X                              | Y         | Z         |
| 26            | 3.291246                       | -1.446110 | 0.668128  |
| 7             | -0.082520                      | 1.229450  | -0.536661 |
| 6             | 3.294138                       | -3.160905 | -0.503134 |
| 1             | 2.391885                       | -3.703287 | -0.752224 |
| 6             | 3.834267                       | -2.063612 | -1.239959 |
| 1             | 3.425162                       | -1.654774 | -2.154513 |
| 6             | 4.980714                       | -1.578417 | -0.539489 |
| 1             | 5.595302                       | -0.736397 | -0.829960 |
| 6             | 5.151143                       | -2.377389 | 0.631703  |
| 1             | 5.912246                       | -2.242065 | 1.389105  |
| 6             | 4.109575                       | -3.354820 | 0.653093  |
| 1             | 3.944457                       | -4.088382 | 1.431401  |
| 6             | 2.877129                       | 0.543042  | 1.092669  |
| 1             | 3.415402                       | 1.383563  | 0.674290  |
| 6             | 3.205285                       | -0.148936 | 2.295256  |
| 1             | 4.041799                       | 0.069855  | 2.946057  |
| 6             | 2.264631                       | -1.210915 | 2.464615  |
| 1             | 2.268728                       | -1.939517 | 3.264554  |
| 6             | 1.356697                       | -1.180639 | 1.366766  |
| 1             | 0.558057                       | -1.881536 | 1.163970  |
| 6             | 1.734646                       | -0.097569 | 0.507481  |
| 6             | 1.042091                       | 0.298230  | -0.766051 |
| 1             | 1.736645                       | 0.796834  | -1.442775 |
| 1             | 0.619393                       | -0.572633 | -1.270579 |
| 6             | -0.027131                      | 2.575097  | -0.297938 |
| 6             | -1.270954                      | 2.959540  | 0.189142  |
| 1             | -1.576243                      | 3.967088  | 0.428608  |
| 6             | -2.044242                      | 1.786932  | 0.224034  |
| 6             | -3.425512                      | 1.490463  | 0.586788  |
| 6             | -4.283579                      | 2.454210  | 1.129223  |
| 1             | -3.927060                      | 3.470519  | 1.279222  |
| 6             | -5.589013                      | 2.113755  | 1.481398  |

|    |           |           |           |
|----|-----------|-----------|-----------|
| 1  | -6.252788 | 2.863044  | 1.903494  |
| 6  | -6.030013 | 0.805592  | 1.290669  |
| 1  | -7.043532 | 0.526003  | 1.568108  |
| 6  | -5.174136 | -0.160015 | 0.742066  |
| 1  | -5.561839 | -1.165504 | 0.614077  |
| 6  | -3.864271 | 0.158198  | 0.378251  |
| 6  | 1.157705  | 3.416118  | -0.554228 |
| 6  | 1.636310  | 4.262730  | 0.458588  |
| 1  | 1.153472  | 4.251696  | 1.431311  |
| 6  | 2.731639  | 5.094617  | 0.226979  |
| 1  | 3.093964  | 5.740553  | 1.021878  |
| 6  | 3.364384  | 5.092181  | -1.018066 |
| 1  | 4.219208  | 5.738318  | -1.196934 |
| 6  | 2.890070  | 4.259937  | -2.034771 |
| 1  | 3.368089  | 4.263680  | -3.010370 |
| 6  | 1.791889  | 3.430872  | -1.807858 |
| 1  | 1.406637  | 2.810833  | -2.612374 |
| 7  | -1.306229 | 0.749730  | -0.204473 |
| 46 | -2.435468 | -1.048042 | -0.444891 |
| 17 | -0.783948 | -2.593516 | -1.473136 |
| 15 | -3.697619 | -2.921772 | -0.772375 |
| 1  | -3.238908 | -4.106957 | -0.149759 |
| 1  | -5.075277 | -3.000015 | -0.417945 |
| 1  | -3.783816 | -3.369798 | -2.111496 |

---

**b)**

**Calculated total energy (in Hartrees)**

| in vacuum      | in toluene     | in methanol    |
|----------------|----------------|----------------|
| -1386.41837055 | -1386.43179221 | -1386.44390268 |

---

**Table S5. a)** Final atomic coordinates for the optimized geometry of

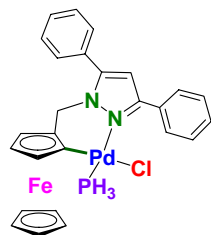

(B-type model complex with L = PH<sub>3</sub>)

**b)** its calculated total energy (in vacuum, toluene and methanol).

**a)**

| Atomic Number | Atomic Coordinates (Angstroms) |           |           |
|---------------|--------------------------------|-----------|-----------|
|               | X                              | Y         | Z         |
| 26            | -0.866310                      | -2.416596 | 0.881446  |
| 7             | -1.058897                      | 0.766918  | -0.749089 |
| 6             | -0.248141                      | -1.412952 | 2.604958  |
| 1             | 0.609991                       | -0.757566 | 2.654093  |
| 6             | -1.578141                      | -1.022192 | 2.268502  |
| 1             | -1.898978                      | -0.015903 | 2.035865  |
| 6             | -2.398078                      | -2.191574 | 2.277489  |
| 1             | -3.454425                      | -2.233756 | 2.045308  |
| 6             | -1.573168                      | -3.305410 | 2.621895  |
| 1             | -1.891724                      | -4.337962 | 2.681878  |
| 6             | -0.244501                      | -2.823409 | 2.823516  |
| 1             | 0.620795                       | -3.427254 | 3.064000  |
| 6             | -1.691634                      | -2.899879 | -0.957492 |
| 1             | -2.752836                      | -3.018284 | -1.140782 |
| 6             | -0.791026                      | -3.920321 | -0.530944 |
| 1             | -1.052291                      | -4.947995 | -0.311890 |
| 6             | 0.504688                       | -3.326734 | -0.382230 |
| 1             | 1.385836                       | -3.846278 | -0.027115 |
| 6             | 0.425367                       | -1.942600 | -0.735484 |
| 6             | -0.943370                      | -1.682045 | -1.067329 |
| 6             | -1.435233                      | -0.366801 | -1.600159 |
| 1             | -1.015211                      | -0.185192 | -2.598576 |
| 1             | -2.521178                      | -0.350039 | -1.688561 |
| 6             | -1.828349                      | 1.814107  | -0.334067 |
| 6             | -0.981896                      | 2.672384  | 0.353533  |
| 1             | -1.271564                      | 3.570315  | 0.878175  |
| 6             | 0.295819                       | 2.078657  | 0.329061  |
| 6             | 1.497550                       | 2.568946  | 1.023689  |
| 6             | 1.710262                       | 3.951645  | 1.137590  |
| 1             | 1.025975                       | 4.640228  | 0.649729  |

|    |           |           |           |
|----|-----------|-----------|-----------|
| 6  | 2.806027  | 4.445013  | 1.842897  |
| 1  | 2.963444  | 5.517987  | 1.911511  |
| 6  | 3.702508  | 3.563717  | 2.450928  |
| 1  | 4.557345  | 3.947861  | 3.000896  |
| 6  | 3.497037  | 2.186733  | 2.345919  |
| 1  | 4.190474  | 1.494648  | 2.815865  |
| 6  | 2.403012  | 1.691773  | 1.639287  |
| 1  | 2.246569  | 0.620353  | 1.560473  |
| 6  | -3.277760 | 1.950599  | -0.577667 |
| 6  | -3.768660 | 3.151403  | -1.115579 |
| 1  | -3.068597 | 3.936867  | -1.385083 |
| 6  | -5.136794 | 3.330324  | -1.317756 |
| 1  | -5.500616 | 4.263201  | -1.739422 |
| 6  | -6.034320 | 2.312987  | -0.987036 |
| 1  | -7.099856 | 2.451861  | -1.147313 |
| 6  | -5.557160 | 1.117929  | -0.444421 |
| 1  | -6.251165 | 0.327606  | -0.171678 |
| 6  | -4.189962 | 0.937477  | -0.235355 |
| 1  | -3.828089 | 0.017982  | 0.216253  |
| 46 | 1.759559  | -0.451212 | -1.012538 |
| 7  | 0.233252  | 0.927933  | -0.367930 |
| 17 | 3.401684  | 1.220890  | -1.736565 |
| 15 | 3.393044  | -1.825161 | -1.787578 |
| 1  | 3.258873  | -3.241711 | -1.736443 |
| 1  | 4.674080  | -1.687075 | -1.202592 |
| 1  | 3.728276  | -1.672986 | -3.153555 |

---

**b)**

**Calculated total energy (in Hartrees)**

| in vacuum      | in toluene     | in methanol    |
|----------------|----------------|----------------|
| -1386.40766262 | -1386.42284279 | -1386.43697961 |

---

**Table S6. a)** Final atomic coordinates for the optimized geometry of

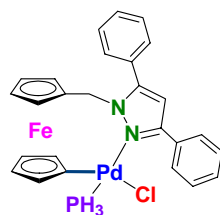

(C-type model complex with L = PH<sub>3</sub>)

**b)** its calculated total energy (in vacuum, toluene and methanol).

**a)**

| Atomic Number | Atomic Coordinates (Angstroms) |           |           |
|---------------|--------------------------------|-----------|-----------|
|               | X                              | Y         | Z         |
| 26            | 0.087770                       | 2.569302  | 0.902729  |
| 7             | -1.347561                      | -0.528740 | -0.568074 |
| 6             | 1.352338                       | 1.187215  | 1.801058  |
| 1             | 1.027172                       | 0.252588  | 2.236496  |
| 6             | 1.740583                       | 1.380896  | 0.433893  |
| 6             | 2.050029                       | 2.776699  | 0.292622  |
| 1             | 2.331498                       | 3.277783  | -0.625506 |
| 6             | 1.861085                       | 3.426723  | 1.552734  |
| 1             | 1.983757                       | 4.484244  | 1.750700  |
| 6             | 1.429541                       | 2.439481  | 2.487130  |
| 1             | 1.169804                       | 2.615529  | 3.523556  |
| 6             | -1.136011                      | 3.271690  | -0.613059 |
| 1             | 0.777005                       | 3.594086  | -1.582333 |
| 6             | -1.284509                      | 4.094081  | 0.543936  |
| 1             | -1.050356                      | 5.148639  | 0.606978  |
| 6             | -1.739872                      | 3.268246  | 1.615207  |
| 1             | -1.912009                      | 3.585435  | 2.635343  |
| 6             | -1.882766                      | 1.938108  | 1.119008  |
| 1             | -2.179776                      | 1.072955  | 1.696192  |
| 6             | -1.502353                      | 1.932130  | -0.261086 |
| 6             | -1.554371                      | 0.768559  | -1.217285 |
| 1             | -2.532823                      | 0.717981  | -1.701942 |
| 1             | -0.798628                      | 0.866784  | -2.001437 |
| 6             | -2.292423                      | -1.348931 | -0.013644 |
| 6             | -1.606379                      | -2.279178 | 0.751656  |
| 1             | -2.032738                      | -3.122901 | 1.273476  |
| 6             | -0.236585                      | -1.978815 | 0.603712  |
| 6             | 0.901222                       | -2.707841 | 1.196327  |
| 6             | 0.842827                       | -3.079883 | 2.549756  |
| 1             | -0.023749                      | -2.801127 | 3.143830  |
| 6             | 1.893860                       | -3.783235 | 3.136744  |
| 1             | 1.839753                       | -4.057129 | 4.187001  |
| 6             | 3.013787                       | -4.129255 | 2.377004  |
| 1             | 3.833341                       | -4.678018 | 2.833425  |

|    |           |           |           |
|----|-----------|-----------|-----------|
| 6  | 3.071591  | -3.775163 | 1.027467  |
| 1  | 3.931476  | -4.058593 | 0.426324  |
| 6  | 2.022958  | -3.071207 | 0.433300  |
| 1  | 2.054648  | -2.828686 | -0.625038 |
| 6  | -3.741292 | -1.246891 | -0.271794 |
| 6  | -4.641132 | -1.234118 | 0.805608  |
| 1  | -4.255595 | -1.254936 | 1.821063  |
| 6  | -6.016299 | -1.184284 | 0.578547  |
| 1  | -6.700768 | -1.170178 | 1.422208  |
| 6  | -6.511330 | -1.146326 | -0.726534 |
| 1  | -7.582634 | -1.104942 | -0.902426 |
| 6  | -5.624518 | -1.169737 | -1.805301 |
| 1  | -6.003163 | -1.157664 | -2.823541 |
| 6  | -4.249246 | -1.225668 | -1.582057 |
| 1  | -3.565146 | -1.283612 | -2.424203 |
| 7  | -0.100336 | -0.903132 | -0.187720 |
| 46 | 1.675529  | -0.014870 | -1.024703 |
| 17 | 1.666706  | -1.540075 | -2.963128 |
| 15 | 3.612200  | 0.706547  | -1.973118 |
| 1  | 4.393981  | 1.742357  | -1.391847 |
| 1  | 4.612264  | -0.281018 | -2.139326 |
| 1  | 3.534201  | 1.188961  | -3.302790 |

---

**b)**

**Calculated total energy (in Hartrees)**

| in vacuum      | in toluene     | in methanol    |
|----------------|----------------|----------------|
| -1386.41189326 | -1386.42670869 | -1386.44027157 |

---



**Table S7. a)** Final atomic coordinates for the optimized geometry of

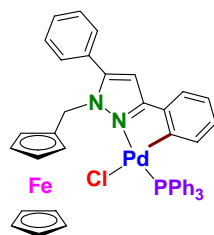

(A-type model complex with L = PPh<sub>3</sub>)

**b)** its calculated total energy in vacuum, toluene and methanol.

**a)**

| Atomic Number | Atomic Coordinates (Angstroms) |           |           |
|---------------|--------------------------------|-----------|-----------|
|               | X                              | Y         | Z         |
| 26            | -4.237423                      | -2.30237  | -0.700237 |
| 7             | -2.116008                      | 1.469444  | 0.403225  |
| 6             | -3.357384                      | -3.856673 | 0.361359  |
| 1             | -2.288222                      | -3.929383 | 0.510880  |
| 6             | -4.269490                      | -3.146364 | 1.199728  |
| 1             | -4.011919                      | -2.616237 | 2.107420  |
| 6             | -5.568559                      | -3.223091 | 0.610492  |
| 1             | -6.470244                      | -2.762735 | 0.993471  |
| 6             | -5.460610                      | -3.982903 | -0.593800 |
| 1             | -6.264797                      | -4.195653 | -1.286071 |
| 6             | -4.095167                      | -4.374167 | -0.746409 |
| 1             | -3.683410                      | -4.930505 | -1.578321 |
| 6             | -4.754031                      | -0.309127 | -0.967321 |
| 1             | -5.525520                      | 0.203177  | -0.406798 |
| 6             | -4.934184                      | -1.023008 | -2.188618 |
| 1             | -5.870370                      | -1.155734 | -2.715091 |
| 6             | -3.671433                      | -1.574367 | -2.567127 |
| 1             | -3.486485                      | -2.200482 | -3.430318 |
| 6             | -2.710892                      | -1.206657 | -1.580532 |
| 1             | -1.672564                      | -1.507034 | -1.538182 |
| 6             | -3.377676                      | -0.427371 | -0.580462 |
| 6             | -2.738226                      | 0.152580  | 0.649685  |
| 1             | -3.480496                      | 0.294420  | 1.435763  |
| 1             | -1.944416                      | -0.499728 | 1.017419  |
| 6             | -2.735019                      | 2.689762  | 0.371047  |
| 6             | -1.868123                      | 3.574617  | -0.257187 |
| 1             | -2.027432                      | 4.633717  | -0.395283 |
| 6             | -0.729998                      | 2.818288  | -0.588647 |
| 6             | 0.530153                       | 3.127662  | -1.253889 |
| 6             | 0.718087                       | 4.320117  | -1.964559 |
| 1             | -0.058421                      | 5.081679  | -1.953416 |
| 6             | 1.879258                       | 4.517308  | -2.709794 |
| 1             | 2.022302                       | 5.441138  | -3.263917 |

|    |           |           |           |
|----|-----------|-----------|-----------|
| 6  | 2.836683  | 3.505372  | -2.758826 |
| 1  | 3.731767  | 3.629715  | -3.363865 |
| 6  | 2.659775  | 2.321726  | -2.028750 |
| 1  | 3.431201  | 1.564620  | -2.093242 |
| 6  | 1.526201  | 2.117823  | -1.239116 |
| 6  | -4.069533 | 2.958690  | 0.939433  |
| 6  | -5.035753 | 3.613006  | 0.158315  |
| 1  | -4.800352 | 3.869249  | -0.870528 |
| 6  | -6.289808 | 3.915280  | 0.688879  |
| 1  | -7.028543 | 4.417806  | 0.070476  |
| 6  | -6.597908 | 3.567397  | 2.005909  |
| 1  | -7.575880 | 3.800911  | 2.417685  |
| 6  | -5.641263 | 2.922654  | 2.793540  |
| 1  | -5.868784 | 2.660945  | 3.823295  |
| 6  | -4.384624 | 2.624508  | 2.267533  |
| 1  | -3.633067 | 2.152627  | 2.894369  |
| 7  | -0.901900 | 1.543933  | -0.199340 |
| 46 | 0.991610  | 0.459887  | -0.167032 |
| 17 | 0.172538  | -1.648203 | 0.846404  |
| 15 | 3.112089  | -0.413508 | 0.292212  |
| 6  | 4.645759  | 0.512255  | -0.202057 |
| 6  | 6.938974  | 1.989882  | -0.867391 |
| 6  | 5.576493  | 0.003293  | -1.117234 |
| 6  | 4.874945  | 1.772904  | 0.375106  |
| 6  | 6.014356  | 2.503379  | 0.047599  |
| 6  | 6.717142  | 0.742162  | -1.448554 |
| 1  | 5.418020  | -0.968666 | -1.572434 |
| 1  | 4.156366  | 2.184952  | 1.078182  |
| 1  | 6.178213  | 3.476975  | 0.501332  |
| 1  | 7.431370  | 0.335234  | -2.159442 |
| 1  | 7.826074  | 2.562303  | -1.124966 |
| 6  | 3.445006  | -0.623646 | 2.108777  |
| 6  | 4.000217  | -0.900310 | 4.849379  |
| 6  | 2.416063  | -0.520625 | 3.055135  |
| 6  | 4.759035  | -0.858801 | 2.553541  |
| 6  | 5.031649  | -1.004722 | 3.913530  |
| 6  | 2.696907  | -0.655780 | 4.416593  |
| 1  | 1.396829  | -0.364517 | 2.723757  |
| 1  | 5.574567  | -0.918647 | 1.839668  |
| 1  | 6.051237  | -1.191503 | 4.240041  |
| 1  | 1.888636  | -0.572230 | 5.137995  |
| 1  | 4.213650  | -1.006533 | 5.909784  |
| 6  | 3.322252  | -2.068114 | -0.505165 |
| 6  | 3.627735  | -4.509273 | -1.850258 |
| 6  | 3.930748  | -3.155418 | 0.134407  |
| 6  | 2.857918  | -2.217008 | -1.821394 |
| 6  | 3.017795  | -3.429024 | -2.492392 |
| 6  | 4.078572  | -4.371014 | -0.536886 |

|   |          |           |           |
|---|----------|-----------|-----------|
| 1 | 4.274492 | -3.064578 | 1.159270  |
| 1 | 2.356277 | -1.387530 | -2.312833 |
| 1 | 2.653201 | -3.532662 | -3.510742 |
| 1 | 4.541966 | -5.211745 | -0.027592 |
| 1 | 3.742287 | -5.457272 | -2.369080 |

---

**b)**

**Calculated total energy (in Hartrees)**

| in vacuum      | in toluene     | in methanol    |
|----------------|----------------|----------------|
| -2079.56213985 | -2079.57805683 | -2079.59479313 |

---

**Table S8. a)** Final atomic coordinates for the optimized geometry of

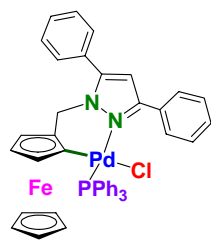

(B-type model complex with L = PPh<sub>3</sub>)

**b)** its calculated total energy in vacuum, toluene and methanol.

**a)**

| Atomic Number | Atomic Coordinates (Angstroms) |           |           |
|---------------|--------------------------------|-----------|-----------|
|               | X                              | Y         | Z         |
| 26            | -1.626876                      | -2.121505 | 1.461128  |
| 7             | -2.601561                      | 0.315115  | -0.932184 |
| 6             | -2.039011                      | -0.659906 | 2.897105  |
| 1             | -1.621290                      | 0.336806  | 2.889950  |
| 6             | -3.248644                      | -1.060802 | 2.256032  |
| 1             | -3.910416                      | -0.413739 | 1.696334  |
| 6             | -3.419097                      | -2.462502 | 2.471059  |
| 1             | -4.230211                      | -3.072958 | 2.094967  |
| 6             | -2.314045                      | -2.926604 | 3.248292  |
| 1             | -2.134569                      | -3.950061 | 3.550931  |
| 6             | -1.460966                      | -1.812034 | 3.510082  |
| 1             | -0.517507                      | -1.844810 | 4.038746  |
| 6             | -1.636308                      | -3.204875 | -0.302682 |
| 1             | -2.474043                      | -3.801513 | -0.643760 |
| 6             | -0.576735                      | -3.641193 | 0.545178  |
| 1             | -0.474021                      | -4.627981 | 0.979332  |
| 6             | 0.288687                       | -2.523513 | 0.776235  |
| 1             | 1.155971                       | -2.543462 | 1.419545  |
| 6             | -0.198949                      | -1.387656 | 0.052717  |
| 6             | -1.411504                      | -1.817779 | -0.589494 |
| 6             | -2.214475                      | -0.964395 | -1.531526 |
| 1             | -1.632471                      | -0.742706 | -2.436261 |
| 1             | -3.132056                      | -1.463856 | -1.841293 |
| 6             | -3.820790                      | 0.926707  | -0.910879 |
| 6             | -3.632147                      | 2.143627  | -0.270726 |
| 1             | -4.401772                      | 2.857749  | -0.019309 |
| 6             | -2.268706                      | 2.202737  | 0.083045  |
| 6             | -1.619251                      | 3.259687  | 0.875610  |
| 6             | -2.087890                      | 4.579226  | 0.781627  |
| 1             | -2.874250                      | 4.818415  | 0.071333  |
| 6             | -1.531725                      | 5.588930  | 1.564838  |
| 1             | -1.899231                      | 6.607229  | 1.470159  |
| 6             | -0.501093                      | 5.295552  | 2.459856  |

|    |           |           |           |
|----|-----------|-----------|-----------|
| 1  | -0.066323 | 6.082607  | 3.070095  |
| 6  | -0.030020 | 3.985102  | 2.563062  |
| 1  | 0.773034  | 3.748461  | 3.256143  |
| 6  | -0.584557 | 2.975203  | 1.779662  |
| 1  | -0.214790 | 1.957738  | 1.860021  |
| 6  | -5.068960 | 0.356347  | -1.454271 |
| 6  | -5.853201 | 1.134770  | -2.321258 |
| 1  | -5.500417 | 2.119673  | -2.613133 |
| 6  | -7.062827 | 0.646779  | -2.814447 |
| 1  | -7.655747 | 1.259941  | -3.487542 |
| 6  | -7.506995 | -0.626210 | -2.450760 |
| 1  | -8.448496 | -1.006939 | -2.836911 |
| 6  | -6.738076 | -1.406026 | -1.584292 |
| 1  | -7.084140 | -2.392018 | -1.286119 |
| 6  | -5.530428 | -0.918872 | -1.084236 |
| 1  | -4.953544 | -1.517566 | -0.384964 |
| 46 | 0.431554  | 0.492232  | -0.438966 |
| 7  | -1.654701 | 1.084800  | -0.346682 |
| 17 | 0.937943  | 2.631946  | -1.463172 |
| 15 | 2.663008  | -0.165055 | -0.449010 |
| 6  | 3.104668  | -1.430486 | -1.729670 |
| 6  | 3.767708  | -3.349863 | -3.670384 |
| 6  | 4.443603  | -1.628004 | -2.110891 |
| 6  | 2.103400  | -2.198787 | -2.340863 |
| 6  | 2.435568  | -3.152523 | -3.305322 |
| 6  | 4.771433  | -2.585370 | -3.071081 |
| 1  | 5.228987  | -1.023346 | -1.668261 |
| 1  | 1.066709  | -2.049957 | -2.061663 |
| 1  | 1.648528  | -3.737699 | -3.773125 |
| 1  | 5.810415  | -2.726395 | -3.356681 |
| 1  | 4.023458  | -4.090247 | -4.423714 |
| 6  | 3.941081  | 1.145678  | -0.735498 |
| 6  | 5.875795  | 3.108895  | -1.261587 |
| 6  | 4.844537  | 1.536447  | 0.261693  |
| 6  | 4.009784  | 1.755647  | -1.999584 |
| 6  | 4.976766  | 2.723890  | -2.259548 |
| 6  | 5.805550  | 2.516535  | -0.001632 |
| 1  | 4.808947  | 1.080893  | 1.245136  |
| 1  | 3.300405  | 1.485231  | -2.772920 |
| 1  | 5.016943  | 3.189169  | -3.240486 |
| 1  | 6.499559  | 2.809804  | 0.781600  |
| 1  | 6.624194  | 3.870036  | -1.466131 |
| 6  | 3.172225  | -0.890965 | 1.180979  |
| 6  | 3.897598  | -1.868329 | 3.712328  |
| 6  | 2.676789  | 0.287098  | 2.347973  |
| 6  | 4.031803  | -1.991983 | 1.296733  |
| 6  | 4.387270  | -2.479526 | 2.556740  |
| 6  | 3.043697  | -0.767536 | 3.605415  |

|   |          |           |          |
|---|----------|-----------|----------|
| 1 | 1.994018 | 0.554187  | 2.267832 |
| 1 | 4.415664 | -2.480609 | 0.407304 |
| 1 | 5.047158 | -3.339640 | 2.632370 |
| 1 | 2.656338 | -0.287062 | 4.499855 |
| 1 | 4.176589 | -2.249133 | 4.691083 |

---

**b)**

**Calculated total energy (in Hartrees)**

| in vacuum      | in toluene     | in methanol    |
|----------------|----------------|----------------|
| -2079.55290941 | -2079.57138085 | -2079.58956336 |

---

**Table S9. a)** Final atomic coordinates for the optimized geometry of

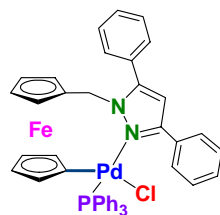

(C-type model complex with L = PPh<sub>3</sub>)

**b)** its calculated total energy in vacuum, toluene and methanol.

**a)**

| Atomic Number | Atomic Coordinates (Angstroms) |           |           |
|---------------|--------------------------------|-----------|-----------|
|               | X                              | Y         | Z         |
| 26            | -1.370972                      | -2.407046 | -1.482653 |
| 7             | -2.793162                      | 0.384076  | 0.494864  |
| 6             | -0.642078                      | -0.805696 | -2.572880 |
| 1             | -1.234093                      | 0.065567  | -2.818938 |
| 6             | 0.159911                       | -0.973884 | -1.390584 |
| 6             | 0.691222                       | -2.307064 | -1.460141 |
| 1             | 1.301334                       | -2.783183 | -0.704372 |
| 6             | 0.246182                       | -2.933398 | -2.666324 |
| 1             | 0.460548                       | -3.948993 | -2.975306 |
| 6             | -0.582102                      | -2.001276 | -3.357739 |
| 1             | -1.109688                      | -2.181584 | -4.286164 |
| 6             | -1.994330                      | -3.325476 | 0.263177  |
| 1             | -1.329335                      | -3.580684 | 1.078414  |
| 6             | -2.314328                      | -4.153870 | -0.853750 |
| 1             | -1.930030                      | -5.148874 | -1.036286 |
| 6             | -3.179152                      | -3.415080 | -1.716610 |
| 1             | -3.568293                      | -3.751896 | -2.668646 |
| 6             | -3.402761                      | -2.134512 | -1.128953 |
| 1             | -3.990492                      | -1.332576 | -1.555373 |
| 6             | -2.661971                      | -2.069193 | 0.093973  |
| 6             | -2.643723                      | -0.944232 | 1.091487  |
| 1             | -3.470028                      | -1.054136 | 1.798670  |
| 1             | -1.713520                      | -0.936698 | 1.666567  |
| 6             | -3.923996                      | 1.143796  | 0.392596  |
| 6             | -3.565714                      | 2.287428  | -0.301616 |
| 1             | -4.218085                      | 3.109306  | -0.554997 |
| 6             | -2.187086                      | 2.168873  | -0.576474 |
| 6             | -1.332329                      | 3.180052  | -1.227226 |
| 6             | -1.676315                      | 4.537545  | -1.109247 |
| 1             | -2.539501                      | 4.821126  | -0.514542 |
| 6             | -0.903836                      | 5.526374  | -1.715919 |
| 1             | -1.184036                      | 6.570388  | -1.604174 |

|    |           |           |           |
|----|-----------|-----------|-----------|
| 6  | 0.230615  | 5.178862  | -2.452206 |
| 1  | 0.834773  | 5.949313  | -2.923701 |
| 6  | 0.583064  | 3.833492  | -2.575667 |
| 1  | 1.460998  | 3.549512  | -3.150172 |
| 6  | -0.190693 | 2.842080  | -1.971930 |
| 1  | 0.089391  | 1.801117  | -2.081559 |
| 6  | -5.240393 | 0.772232  | 0.951975  |
| 6  | 6.353584  | 0.670181  | 0.103316  |
| 1  | -6.224371 | 0.826648  | -0.963976 |
| 6  | -7.612547 | 0.363988  | 0.620517  |
| 1  | -8.464765 | 0.284143  | -0.048775 |
| 6  | -7.775642 | 0.155997  | 1.991492  |
| 1  | -8.755859 | -0.084739 | 2.393691  |
| 6  | -6.675701 | 0.265052  | 2.845351  |
| 1  | -6.798772 | 0.119069  | 3.914942  |
| 6  | -5.416742 | 0.576251  | 2.332090  |
| 1  | -4.570194 | 0.694072  | 3.003124  |
| 7  | -1.740979 | 0.993184  | -0.098860 |
| 46 | 0.306188  | 0.306515  | 0.184802  |
| 17 | 0.214479  | 1.452782  | 2.355334  |
| 15 | 2.566628  | -0.122501 | 0.482752  |
| 6  | 3.689007  | -0.287141 | -0.990151 |
| 6  | 5.444795  | -0.403852 | -3.182116 |
| 6  | 5.073310  | -0.442134 | -0.792353 |
| 6  | 3.201322  | -0.174087 | -2.298605 |
| 6  | 4.076550  | -0.231113 | -3.386925 |
| 6  | 5.942088  | -0.509042 | -1.880245 |
| 1  | 5.477037  | -0.495920 | 0.214260  |
| 1  | 2.138805  | -0.050446 | -2.468894 |
| 1  | 3.681331  | -0.142161 | -4.395235 |
| 1  | 7.008311  | -0.632516 | -1.710153 |
| 1  | 6.123264  | -0.449904 | -4.029888 |
| 6  | 3.443452  | 1.209609  | 1.422188  |
| 6  | 4.844824  | 3.286694  | 2.677540  |
| 6  | 3.249177  | 2.539335  | 1.019204  |
| 6  | 4.338155  | 0.930029  | 2.462451  |
| 6  | 5.034462  | 1.967705  | 3.087983  |
| 6  | 3.950958  | 3.569439  | 1.641157  |
| 1  | 2.535035  | 2.771649  | 0.234831  |
| 1  | 4.486763  | -0.091484 | 2.797854  |
| 1  | 5.720884  | 1.740230  | 3.899385  |
| 1  | 3.786828  | 4.596334  | 1.326310  |
| 1  | 5.384263  | 4.093156  | 3.167195  |
| 6  | 2.797701  | -1.659314 | 1.486242  |
| 6  | 2.967771  | -3.976385 | 3.060572  |
| 6  | 2.149327  | -1.719215 | 2.734052  |
| 6  | 3.521122  | -2.771815 | 1.034049  |
| 6  | 3.602372  | -3.925475 | 1.819528  |



|   |          |           |          |
|---|----------|-----------|----------|
| 6 | 2.243293 | -2.870289 | 3.515367 |
| 1 | 1.569612 | -0.866442 | 3.080091 |
| 1 | 4.019523 | -2.745606 | 0.070700 |
| 1 | 4.164093 | -4.782200 | 1.456731 |
| 1 | 1.744379 | -2.903907 | 4.480255 |
| 1 | 3.033991 | -4.873544 | 3.670401 |

---

**b)**

**Calculated total energy (in Hartrees)**

---

|                |                |                |
|----------------|----------------|----------------|
| in vacuum      | in toluene     | in methanol    |
| -2079.55795611 | -2079.57564349 | -2079.59266393 |

---
